1 Title: **Development of microsatellite markers for a giant water bug, *Appasus***  
2 ***japonicus*, distributed in East Asia**

3

4 Authors: Tomoya Suzuki,<sup>1\*</sup> Akira S. Hirao,<sup>2,3</sup> Masaki Takenaka,<sup>4</sup> Koki Yano,<sup>5</sup> Koji  
5 Tojo<sup>1,6,\*</sup>

6

7 <sup>1</sup>Faculty of Science, Shinshu University, Asahi 3-1-1, Matsumoto, Nagano 390-8621,  
8 Japan

9 <sup>2</sup>Sugadaira Research Station, Mountain Science Center, University of Tsukuba,  
10 Sugadairakogen 1278-294, Ueda, Nagano 386-2204, Japan

11 <sup>3</sup>Faculty of Symbiotic Systems Science, Fukushima University, Kanayagawa 1,  
12 Fukushima, Fukushima 960-1296, Japan

13 <sup>4</sup>Division of Evolutionary Developmental Biology, National Institute for Basic Biology,  
14 Nishigonaka 38, Myodaiji, Okazaki, Aichi 44-8585, Japan

15 <sup>5</sup>Department of Mountain and Environmental Science, Interdisciplinary Graduate  
16 School of Science and Technology, Shinshu University, Asahi 3-1-1, Matsumoto,  
17 Nagano 390-8621, Japan

18 <sup>6</sup>Institute of Mountain Science, Shinshu University, Asahi 3-1-1, Matsumoto, Nagano  
19 390-8621, Japan

20

21 \*Corresponding authors

22 Koji Tojo: [ktojo@shinshu-u.ac.jp](mailto:ktojo@shinshu-u.ac.jp)

23 Tomoya Suzuki: [suzuki\\_t@shinshu-u.ac.jp](mailto:suzuki_t@shinshu-u.ac.jp)

24

25

26

1 **Abstract**

2           We developed microsatellite markers for *Appasus japonicus* (Hemiptera:  
3 Belostomatidae). This belostomatid bug is distributed in East Asia (Japanese  
4 Archipelago, Korean Peninsula, and Mainland China), and often listed as endangered  
5 species in the ‘Red List’ or the ‘Red Data Book’ at the national and local level in Japan.  
6 Here we describe twenty novel polymorphic microsatellite loci developed for *A.*  
7 *japonicus*, and marker suitability was evaluated on 56 individuals from four *A.*  
8 *japonicus* populations (Nagano, Hiroshima, and Yamaguchi prefecture, Japan, and  
9 Chungcheongnam-do, Korea). The number of alleles per locus ranged 1–12 (mean =  
10 2.5), and average observed and expected heterozygosity, and fixation index per locus  
11 were 0.270, 0.323, and 0.153, respectively. The 20 markers described here will be useful  
12 for investigating the genetic structure of *A. japonicus* populations, which can contribute  
13 in population genetics studies of this species.

14

15 **Key words:** endangered species, giant water bug, genetic variation, SSR, Ion PGM

16

17

18

19

20

21

22

1           Freshwater biodiversity, including that of aquatic invertebrates, is the  
2 overriding conservation priority of the International ‘Water for Life’ Decade for Action  
3 (Dudgeon et al., 2006; Doi et al., 2017). *Appasus japonicus* is an aquatic insect, which  
4 is distributed throughout the Japanese Archipelago, Korean Peninsula, and Mainland  
5 China. This species is often listed as endangered species in the ‘Red List’ or the ‘Red  
6 Data Book’ at the national and local level (Ministry of the Environment, Japan, 2006).  
7 Their evolutionary history is revealed by our previous study using mtDNA COI and 16S  
8 rRNA regions, and three largely divided genetic lineages were identified within this  
9 species (Suzuki et al., 2013, 2014). Furthermore, “back dispersal” of *A. japonicus*, i.e.,  
10 dispersal from the Japanese Archipelago to Eurasian continent, was suggested from our  
11 previous study (Suzuki et al., 2014). However, more fine-scale analyses, like a  
12 population genetic analysis, have not been conducted. The microsatellite marker is one  
13 of the most useful tools for identifying the population genetic structure and many  
14 studies using microsatellite markers for the fine-scale population genetic analyses (e.g.,  
15 Phillipson and Lytle, 2013; Phillipson et al., 2015; Hirao et al., 2017; Komaki et al.,  
16 2017). Furthermore, the information of the population genetic structure is very  
17 important for conservation of organisms. Therefore, in this study, we developed twenty  
18 microsatellite markers for *A. japonicus*, and evaluated marker suitability using for  
19 population genetic analyses.

20           Microsatellite markers were developed for *A. japonicus* using the Ion PGM  
21 system (Life Technologies). Library preparation and PGM sequencing were conducted  
22 the Sugadaira Montane Research Station, Mountain Science Center, University of

1 Tsukuba, Japan. Total genomic DNA was extracted from the ethanol-preserved tissue of  
2 specimens which collected in Matsumoto, Nagano, and purified using the DNeasy  
3 Blood & Tissue Kit (QIAGEN, Hilden) according to the manufacturer's instructions.  
4 The concentration of genomic DNA was quantified by a Qubit 2.0 Fluorometer (Life  
5 Technologies), and 13.6 ng/ $\mu$ L of DNA was used for the following processes. The  
6 genomic DNA was sheared to approximately 350–450 bp by Ion Shear Plus Reagents  
7 (Life Technologies), and the adapter ligation, nick-repair, and purification of the ligated  
8 DNA was conducted using an Ion Plus Fragment Library Kit (Life Technologies). After  
9 size selection (target insert sizes 300–400 bp) was performed by an E-Gel Agarose Gel  
10 Electrophoresis System (Life Technologies), library amplification was conducted using  
11 an Ion Plus Fragment Library Kit (Life Technologies). The library was assessed and  
12 quantified using a Bioanalyzer (Agilent Technologies, Palo Alto, California, USA), and  
13 then diluted to 8 pM for template preparation using an Ion PGM Template OT2 400 kit  
14 (Life Technologies) and enriched. Sequencing was performed by an Ion PGM  
15 Sequencing 400 kit (Life Technologies) using 850 flows on the Ion 314 Chip V2 (Life  
16 Technologies) according to the manufacturer's protocol. After sequencing, single  
17 processing and base-calling were performed using TorrentSuite 3.6 (Life Technologies),  
18 and a library-specific FASTQ file was generated. The data sets were collated and  
19 applied to the QDD bioinformatics pipeline (Meglécz et al., 2010) to filter sequences  
20 containing microsatellites with appropriate flanking sequences to define PCR primers.  
21 QDD detected 10,760 loci, each containing a microsatellite consisting of at least five  
22 repeats. A total of 50 primer pairs were obtained for screening. Twenty primer pairs

1 showing clear peak patterns were selected after an initial primer screening using 8  
2 samples from Matsumoto, Nagano population, and 8 samples from Shimonoseki,  
3 Hiroshima population (Table 1).

4 To test the genetic variation of the 20 selected microsatellite loci, 20 samples  
5 from Matsumoto, Nagano, 10 samples from Mihara, Hiroshima, and 10 samples from  
6 Shimonoseki, Yamaguchi were used. PCR amplification with fluorescent dye-labeled  
7 primers was performed using a protocol described by Shimizu and Yano (2011). PCR  
8 amplification was done in 10  $\mu$ L reactions using the KOD FX Neo DNA polymerase  
9 (TOYOBO, Osaka, Japan). Each reaction contained the following components: 1  $\mu$ L of  
10 total genomic DNA, 4.8  $\mu$ L of 2  $\times$  buffer, 1.6  $\mu$ L of 2.0 mM dNTP mix, 0.05  $\mu$ L of  
11 forward primer, 0.2  $\mu$ L of reverse primer, 0.05  $\mu$ L of fluorescent dye-labeled primer and  
12 2.3  $\mu$ L of SQ. The PCR protocol was: 94°C for 2 min; 30 $\times$  (98°C for 10 sec, 58°C for  
13 10 sec, and 68°C for 30 sec); 68°C for 5 min. We labeled BStag primers with the  
14 following fluorescent dyes: F9GAC-FAM (5'-CTAGTATCAGGACGAC-3'),  
15 F9GTC-HEX (5'-CTAGTATGAGGACGTC-3'), F9TAC-NED  
16 (5'-CTAGTATCAGGACTAC-3'), F9GCC-PET (5'-CTAGTATTAGGACGCC-3'), and  
17 F9CCG-FAM (5'-CTAGTATTAGGACCCG-3'). Product sizes were determined using  
18 an ABI 3130xl Genetic Analyzer and GeneMapper software (Applied Biosystems) with  
19 GeneScan 500 LIZ dye Size Standard v2.0 (Applied Biosystems). We calculated  
20 observed heterozygosity ( $H_O$ ), expected heterozygosity ( $H_E$ ) and inbreeding coefficients  
21 ( $F_{IS}$ ) using GenAlEx 6.5 (Peakall and Smouse, 2012). We also tested deviation from  
22 Hardy–Weinberg equilibrium and linkage disequilibrium among the polymorphic loci

1 using GENEPOP 4.7 (Rousset, 2008).

2           As a result, all 20 microsatellite markers, which were developed in this study  
3 had meaningful polymorphism. 17 loci were stably amplified and genotyped in Nagano  
4 population, 15 loci were stably amplified and genotyped in Hiroshima and Yamaguchi  
5 population, and 11 loci were stably amplified and genotyped in Chungcheongnam-do  
6 population (Table 2). The number of alleles across per locus the four populations was 1–  
7 12 (mean = 2.5). Four and three loci were not polymorphic in the Hiroshima and  
8 Yamaguchi population, respectively (Table 2). The ranges of  $H_O$ ,  $H_E$  and  $F_{IS}$  per locus  
9 were 0.000–0.800 (mean = 0.270), 0.000–0.900 (mean = 0.323), and -0.414–1.000  
10 (mean = 0.153), respectively (Table 2).

11           In conclusion, we sequenced *A. japonicus* using Ion PGM and found  
12 microsatellite regions. Based on these data, we developed 20 polymorphic microsatellite  
13 markers for this species. These polymorphic markers are the first developed for *A.*  
14 *japonicus*. *A. japonicus* has a high potential as a model organism for the study of  
15 arthropod evolution (e.g. speciation, evolution of a paternal care system). These  
16 microsatellite markers are useful for elucidating broad- and fine-scale population  
17 genetic structure and evolution of unique paternal care mating systems in *A. japonicus*,  
18 not only conservation genetics research.

19

## 20 **Acknowledgements**

21           We are sincerely thankful to Professor Emeritus K. Suzuki of Shinshu  
22 University for arranging the study environment. We also express our thanks to Dr. R.

1 Saito (Fukushima Prefectural Centre for Environmental Creation), and Ms. K. Momose  
2 (Shinshu University) for their cooperation with the field research and collection of  
3 specimens, and Dr. H. Matsumura (Shinshu University) for providing facilities for  
4 genetic analysis. This study was supported by JSPS KAKENHI Grant Numbers  
5 JP20687005, JP23657046, JP16K14807 (K.T.), 285211031 (K.T.), and JP26891010,  
6 JP19K16209 (T.S.), the River Fund of The River Foundation, Japan [27-1215-013  
7 (K.T.), and 27-1263-012 (T.S.)], and the Sasakawa Scientific Research Grant (26-529;  
8 T.S.).

9

10

## 11 **REFERENCES**

- 12 Doi, H., Katano, I., Sakata, Y., Souma, R., Kosuge, T., Nagano, M., Ikeda, K., Yano, K.,  
13 and Tojo, K. (2017). Detection of an endangered aquatic heteropteran using  
14 environmental DNA in a wetland ecosystem. *Royal Society Open Science*, 4(7),  
15 170568.
- 16 Dudgeon, D., Arthington, A. H., Gessner, M. O., Kawabata, Z., Knowler, D. J., Lévêque,  
17 C., Naiman, R. J., Prieur-Richard, A., Soto, D., Stiassny, M. L. J., and Sullivan,  
18 C. A. (2006) Freshwater biodiversity: importance, threats, status and  
19 conservation challenges. *Biol. Rev.* **81**, 163–182.
- 20 Hirao, A. S., Watanabe, M., Tsuyuzaki, S., Shimono, A., Li, X., Masuzawa, T., and  
21 Wada, N. (2017). Genetic diversity within populations of an arctic-alpine  
22 species declines with decreasing latitude across the Northern Hemisphere. *J.*

- 1           Biogeogr. **44**, 2740–2751.
- 2   Komaki, S., Lin, S. M., Nozawa, M., Oumi, S., Sumida, M., and Igawa, T. (2017).
- 3           Fine-scale demographic processes resulting from multiple overseas
- 4           colonization events of the Japanese stream tree frog, *Buergeria japonica*. J.
- 5           Biogeogr. **44**, 1586–1597.
- 6   Megléczy, E., Costedoat, C., Dubut, V., Gilles, A., Malausa, T., Pech, N., and Martin, J. F.
- 7           (2010) QDD: a user-friendly program to select microsatellite markers and
- 8           design primers from large sequencing projects. *Bioinformatics* **26**, 403–404.
- 9   Ministry of the Environment, Japan. (2006) Threatened Wildlife of Japan – Red Data
- 10          Book, 2nd edn, Vol. 5. Ministry of the Environment, Tokyo, Japan.
- 11   Peakall, R. and Smouse P. E. (2012) GenA1Ex 6.5: genetic analysis in Excel. Population
- 12          genetic software for teaching and research-an update. *Bioinformatics* **28**, 2537–
- 13          2539.
- 14   Phillipsen, I. C., and Lytle, D. A. (2013) Aquatic insects in a sea of desert: population
- 15          genetic structure is shaped by limited dispersal in a naturally fragmented
- 16          landscape. *Ecography*, **36**, 731–743.
- 17   Phillipsen, I. C., Kirk, E. H., Bogan, M. T., Mims, M. C., Olden, J. D., and Lytle, D. A.
- 18          (2015) Dispersal ability and habitat requirements determine landscape-level
- 19          genetic patterns in desert aquatic insects. *Mol. Ecol.*, **24**, 54–69.
- 20   Rousset, F. (2008) Genepop'007: a complete reimplementation of the Genepop software
- 21          for Windows and Linux. *Mol. Ecol. Resources* **8**, 103–106.
- 22   Rozen, S., and Skaletsky, H. (1999) Primer3 on the WWW for general users and for



- 1 biologist programmers. In: *Bioinformatics Methods and Protocols: Methods in*  
2 *Molecular Biology*. (eds.: Misener, S., and Krawetz, S. A.), pp. 365–386.  
3 Humana Press, Totowa, New Jersey, USA.
- 4 Shimizu, T., and Yano, K. (2011) A post-labeling method for multiplexed and  
5 multicolored genotyping analysis of SSR, indel and SNP markers in single tube  
6 with bar-coded split tag (BStag). *BMC Res. Notes* **4**, 161.
- 7 Suzuki, T., Kitano, T., Tojo, K. (2014) Contrasting genetic structure of closely related  
8 giant water bugs: phylogeography of *Appasus japonicus* and *Appasus major*  
9 (Insecta: Heteroptera, Belostomatidae). *Mol. Phylogenet. Evol.* **72**, 7–16.
- 10 Suzuki, T., Tanizawa, T., Sekiné, K., Kunimi, J., and Tojo, K. (2013) Morphological and  
11 genetic relationship of two closely related giant water bugs: *Appasus japonicus*  
12 Vuillefroy and *Appasus major* Esaki (Heteroptera: Belostomatidae). *Biol. J.*  
13 *Linn. Soc.* **110**, 615–643.

Table 1. Characteristics of 20 microsatellite primers developed for *ppasus japonicus*.

| Locus | Primer sequences (5'-3')                                   | T <sub>a</sub> (°C) | Bstag     | Repeat motif                        | Size range (bp) | DDBJ accession no. |
|-------|------------------------------------------------------------|---------------------|-----------|-------------------------------------|-----------------|--------------------|
| AJP01 | F: CCCTGTAACAGTTGAGGATTTACA<br>R: AAACCTAATGTGTTCCGATATTCA | 58                  | F9GAC-FAM | (TA) <sub>7</sub>                   | 119-127         | in registration    |
| AJP02 | F: CTGACACCAATCGGAGGAGT<br>R: GATCTCATGCCCGTTGAGAG         | 58                  | F9TAC-NED | (AT) <sub>6</sub> (AC) <sub>4</sub> | 95-105          | in registration    |
| AJP04 | F: TGAAACTCACGAGATTGTTATTCA<br>R: GGAGTCGATGAGTGAGCCAG     | 58                  | F9GTC-HEX | (CT) <sub>7</sub>                   | 105-133         | in registration    |
| AJP07 | F: GTTCGTAACCGATCATGCG<br>R: ACCCAAGTCATACTCGGAGG          | 58                  | F9GAC-FAM | (GT) <sub>16</sub>                  | 129-154         | in registration    |
| AJP08 | F: GACGTGGAATGAATTGTGTAAGT<br>R: TTTACAAGCTCAATAACAAGCTGA  | 58                  | F9GCC-PET | (AT) <sub>7</sub>                   | 151-155         | in registration    |
| AJP09 | F: ACAGGGACTGCTTTGATCGT<br>R: CCCTCTCCTGTGGAAGAGAA         | 58                  | F9GTC-HEX | (CT) <sub>5</sub>                   | 120-124         | in registration    |
| AJP10 | F: CGAAGGGACAGACAGAAATGA<br>R: CGCATAATAAGCTTCCAGGC        | 58                  | F9GTC-HEX | (AT) <sub>9</sub>                   | 95-113          | in registration    |
| AJP11 | F: AAATGGGCTGTAGTGCCA<br>R: TTGCAACGAGTTGTTGATCG           | 58                  | F9TAC-NED | (ATA) <sub>7</sub>                  | 129-147         | in registration    |
| AJP12 | F: TCACGCGGATATAAATTGCC<br>R: CGGAAATTAATGTGAGTCCAGG       | 58                  | F9TAC-NED | (AT) <sub>7</sub>                   | 118-122         | in registration    |
| AJP20 | F: TTCCAGTCTGTGGTTCCAT<br>R: CAGAGGTCAAACCTCAAACACA        | 58                  | F9GTC-HEX | (AT) <sub>7</sub>                   | 180-190         | in registration    |
| AJP21 | F: CGGAACTCCATCCCAGTAGT<br>R: CTGTCGCCACATTTAGGTT          | 58                  | F9GCC-PET | (TA) <sub>7</sub>                   | 119-128         | in registration    |
| AJP24 | F: TCAGGTACGCAGAGGTCTCTAA<br>R: TGAGAGCCCCGATTAATTCCC      | 58                  | F9GCC-PET | (AG) <sub>11</sub>                  | 136-150         | in registration    |
| AJP28 | F: TTTGGAGTTTGTCAAGTCATGT<br>R: TGCAGGCGTCATTCTCTAAA       | 58                  | F9GAC-FAM | (TTA) <sub>7</sub>                  | 182-191         | in registration    |
| AJP31 | F: TGTTTCGGATTAACCCTCG<br>R: CCACGCCAGTAATAATCAA           | 58                  | F9GAC-FAM | (AAC) <sub>7</sub>                  | 154-160         | in registration    |
| AJP34 | F: AACGAAATTGGCACGTGTTAC<br>R: CAAAGCAATATGTTTGTCTGTTATGC  | 58                  | F9GTC-HEX | (CT) <sub>7</sub>                   | 154-156         | in registration    |
| AJP36 | F: ACGGGTATCGACATGCTGAC<br>R: AATTAGAGCCCCAACCAATGCG       | 58                  | F9TAC-NED | (AT) <sub>8</sub>                   | 149-155         | in registration    |
| AJP38 | F: TCGTTAATACACGGGACAGAAA<br>R: GACCCACTGCTCTTCTTCCA       | 58                  | F9GAC-FAM | (AG) <sub>7</sub>                   | 111-119         | in registration    |
| AJP39 | F: ATCTGAGTTCACCCACGTCA<br>R: GCAGGGCACGAAGTTAGGTA         | 58                  | F9GCC-PET | (GT) <sub>9</sub>                   | 120-126         | in registration    |
| AJP43 | F: GCGCAGAACGCATAATTTGT<br>R: AAACCGGTCTTTCTCACGAC         | 58                  | F9TAC-NED | (TG) <sub>9</sub>                   | 191-195         | in registration    |
| AJP47 | F: TGAAACGACCACTCGGGTA<br>R: CAAAGTTGAACTGTTCCGCA          | 58                  | F9GCC-PET | (GA) <sub>7</sub>                   | 112-116         | in registration    |

T<sub>a</sub> = annealing temperature.

Table 2. Genetic variation of the 20 microsatellite loci for two populations of *Pippasus japonicus*.

| Locus | Nagano population<br>(N = 20) |                |                |                 | Hiroshima population<br>(N = 10) |                |                |                 | Yamaguchi population<br>(N = 10) |                |                |                 | Chungcheongnam-do population<br>(N = 16) |                |                |                 |
|-------|-------------------------------|----------------|----------------|-----------------|----------------------------------|----------------|----------------|-----------------|----------------------------------|----------------|----------------|-----------------|------------------------------------------|----------------|----------------|-----------------|
|       | A                             | H <sub>O</sub> | H <sub>E</sub> | F <sub>IS</sub> | A                                | H <sub>O</sub> | H <sub>E</sub> | F <sub>IS</sub> | A                                | H <sub>O</sub> | H <sub>E</sub> | F <sub>IS</sub> | A                                        | H <sub>O</sub> | H <sub>E</sub> | F <sub>IS</sub> |
|       | AJP01                         | 2              | 0.600          | 0.500           | -0.200                           | 3              | 0.333          | 0.568           | 0.413                            | 3              | 0.700          | 0.595           | -0.176                                   | 7              | 0.750          | 0.805           |
| AJP02 | 4                             | 0.400          | 0.336          | -0.190          | -                                | -              | -              | -               | -                                | -              | -              | -               | 5                                        | 0.438          | 0.564          | 0.225           |
| AJP04 | 2                             | 0.150          | 0.139          | -0.081          | 2                                | 0.100          | 0.095          | -0.053          | 3                                | 0.400          | 0.515          | 0.223           | -                                        | -              | -              | -               |
| AJP07 | 3                             | 0.600          | 0.609          | 0.014           | 2                                | 0.100          | 0.095          | -0.053          | 3                                | 0.500          | 0.545          | 0.083           | 12                                       | 0.750          | 0.900          | 0.167           |
| AJP08 | 3                             | 0.100          | 0.096          | -0.039          | 1                                | 0.000          | 0.000          | NA              | 1                                | 0.000          | 0.000          | NA              | 3                                        | 0.438          | 0.461          | 0.051           |
| AJP09 | 3                             | 0.600          | 0.586          | -0.023          | 1                                | 0.000          | 0.000          | NA              | 1                                | 0.000          | 0.000          | NA              | 2                                        | 0.250          | 0.219          | -0.143          |
| AJP10 | 5                             | 0.450          | 0.451          | 0.003           | 3                                | 0.600          | 0.445          | -0.348          | 3                                | 0.300          | 0.515          | 0.417           | 4                                        | 0.200          | 0.296          | 0.323           |
| AJP11 | -                             | -              | -              | -               | 3                                | 0.500          | 0.555          | 0.099           | 4                                | 0.500          | 0.645          | 0.225           | -                                        | -              | -              | -               |
| AJP12 | 3                             | 0.450          | 0.436          | -0.032          | 1                                | 0.000          | 0.000          | NA              | 1                                | 0.000          | 0.000          | NA              | 4                                        | 0.000          | 0.711          | 1.000           |
| AJP20 | 3                             | 0.250          | 0.509          | 0.509           | -                                | -              | -              | -               | -                                | -              | -              | -               | 5                                        | 0.438          | 0.418          | -0.047          |
| AJP21 | 3                             | 0.600          | 0.514          | -0.168          | -                                | -              | -              | -               | -                                | -              | -              | -               | -                                        | -              | -              | -               |
| AJP24 | 4                             | 0.300          | 0.341          | 0.121           | 5                                | 0.800          | 0.685          | -0.168          | 4                                | 0.700          | 0.700          | 0.000           | -                                        | -              | -              | -               |
| AJP28 | 2                             | 0.050          | 0.049          | -0.026          | 1                                | 0.000          | 0.000          | NA              | 2                                | 0.200          | 0.420          | 0.524           | -                                        | -              | -              | -               |
| AJP31 | 3                             | 0.250          | 0.386          | 0.353           | 2                                | 0.400          | 0.320          | -0.250          | 2                                | 0.500          | 0.495          | -0.010          | 2                                        | 0.313          | 0.404          | 0.227           |
| AJP34 | -                             | -              | -              | -               | 2                                | 0.200          | 0.480          | 0.583           | 2                                | 0.100          | 0.255          | 0.608           | -                                        | -              | -              | -               |
| AJP36 | 3                             | 0.600          | 0.531          | -0.129          | 2                                | 0.700          | 0.495          | -0.414          | 3                                | 0.700          | 0.505          | -0.386          | 4                                        | 0.563          | 0.451          | -0.247          |
| AJP38 | 3                             | 0.100          | 0.096          | -0.039          | -                                | -              | -              | -               | -                                | -              | -              | -               | 4                                        | 0.375          | 0.525          | 0.286           |
| AJP39 | -                             | -              | -              | -               | 2                                | 0.111          | 0.105          | -0.059          | 4                                | 0.500          | 0.415          | -0.205          | -                                        | -              | -              | -               |
| AJP43 | 2                             | 0.000          | 0.260          | 1.000           | 2                                | 0.100          | 0.455          | 0.780           | 3                                | 0.222          | 0.370          | 0.400           | -                                        | -              | -              | -               |
| AJP47 | 3                             | 0.700          | 0.601          | -0.164          | -                                | -              | -              | -               | -                                | -              | -              | -               | -                                        | -              | -              | -               |

N, numbers of analyzed individuals; A, number of alleles; H<sub>O</sub>, observed heterozygosity; H<sub>E</sub>, expected heterozygosity; F<sub>IS</sub>, fixation index.
